# Supplementary material for: Multi-Perspective Observation on the Prevalence of Food Allergy in the General Chinese Population: A Meta-Analysis
Source: MDPI journal article supplement (doi:10.3390/nu14235181), 2022-12-06
Supplement: s1 [file s1]

## Supplementary material

**Table S1** JBI Checklist for Prevalence Studies

| Study              | Q1  | Q2      | Q3      | Q4      | Q5      | Q6  | Q7      | Q8      | Q9      |
|--------------------|-----|---------|---------|---------|---------|-----|---------|---------|---------|
| Hu et al., 2021    | Yes | Yes     | Yes     | Yes     | Yes     | No  | Unclear | Yes     | Yes     |
| Tang et al., 2021  | No  | Unclear | Yes     | Yes     | No      | No  | Yes     | Yes     | Yes     |
| Xu et al., 2020    | Yes | Yes     | Yes     | Yes     | Unclear | No  | Yes     | No      | Yes     |
| Sun et al., 2020   | Yes | Yes     | Yes     | No      | Unclear | No  | Unclear | Yes     | Yes     |
| Zang et al., 2019  | Yes | Yes     | Yes     | No      | Yes     | No  | Unclear | Yes     | Yes     |
| Yu et al., 2019    | Yes | Yes     | Yes     | Yes     | Yes     | No  | No      | Yes     | Yes     |
| Wang et al., 2017  | Yes | Yes     | No      | Unclear | Yes     | No  | Yes     | Yes     | Yes     |
| Zhang et al., 2016 | No  | Yes     | Unclear | Yes     | Yes     | No  | Yes     | Yes     | Yes     |
| Wang et al., 2016  | Yes | Yes     | Yes     | Yes     | Yes     | No  | Yes     | Yes     | Yes     |
| Chen et al., 2015  | Yes | Yes     | Yes     | Yes     | Yes     | No  | Yes     | Yes     | Yes     |
| Ye et al., 2010    | Yes | Unclear | Yes     | No      | Unclear | No  | Unclear | Yes     | Yes     |
| Feng et al., 2021  | Yes | Yes     | Yes     | No      | Unclear | No  | Yes     | Yes     | Yes     |
| Li et al., 2019    | Yes | Yes     | Yes     | Yes     | Yes     | No  | Yes     | Yes     | Yes     |
| Shao et al., 2017  | Yes | Yes     | Yes     | Yes     | Yes     | No  | Yes     | Yes     | Yes     |
| Xie et al., 2017   | Yes | Yes     | Yes     | Yes     | Yes     | No  | Yes     | Yes     | Yes     |
| Ma et al., 2009    | No  | Yes     | Yes     | Yes     | Yes     | No  | Yes     | Yes     | Yes     |
| Wang et al., 2019  | Yes | Unclear | Yes     | Yes     | Yes     | No  | Yes     | Yes     | Yes     |
| Zeng et al., 2015  | Yes | Yes     | Yes     | Yes     | Yes     | No  | Yes     | Yes     | Yes     |
| Zhang et al., 2015 | Yes | Yes     | No      | Yes     | Unclear | No  | Yes     | Yes     | Yes     |
| Liu et al., 2013   | Yes | Yes     | No      | Yes     | Yes     | No  | Yes     | Yes     | Yes     |
| Mo et al., 2013    | Yes | Yes     | Yes     | No      | No      | No  | Unclear | Yes     | Yes     |
| Wang et al., 2013  | Yes | Yes     | Yes     | No      | Unclear | No  | Yes     | Yes     | Yes     |
| Wu et al., 2012    | Yes | Yes     | Yes     | Yes     | Yes     | No  | Yes     | Yes     | Yes     |
| Leung et al., 2009 | Yes | Yes     | Yes     | Yes     | Yes     | No  | Yes     | Yes     | Yes     |
| Zhang et al., 2021 | No  | Unclear | Yes     | Yes     | Unclear | Yes | Yes     | Yes     | Yes     |
| Pan et al., 2020   | Yes | Yes     | Yes     | Yes     | Unclear | Yes | Yes     | Yes     | Yes     |
| Li J et al., 2019  | Yes | Yes     | Yes     | Yes     | Yes     | Yes | Yes     | Yes     | Unclear |
| Yang et al., 2015  | Yes | Yes     | Yes     | Yes     | Yes     | Yes | Yes     | Yes     | Unclear |
| Jin et al., 2012   | No  | Unclear | Yes     | Yes     | Yes     | Yes | Yes     | Yes     | Yes     |
| Lv et al., 2005    | No  | No      | Yes     | No      | Yes     | Yes | Yes     | Yes     | Yes     |
| Huan et al., 2020  | Yes | Yes     | Yes     | Yes     | Yes     | Yes | Yes     | Yes     | Yes     |
| Peng et al., 2020  | No  | Yes     | Unclear | No      | Yes     | Yes | Yes     | Yes     | Yes     |
| Xiao et al., 2018  | Yes | Yes     | Yes     | No      | Unclear | Yes | Yes     | Yes     | Yes     |
| Nie et al., 2017   | No  | No      | Yes     | Yes     | Yes     | Yes | Yes     | Yes     | Yes     |
| Zou et al., 2013   | Yes | Yes     | Yes     | Yes     | Yes     | Yes | Yes     | Yes     | Yes     |
| Ma et al., 2020    | No  | No      | No      | Yes     | Yes     | Yes | Yes     | Yes     | Yes     |
| Chen et al., 2012  | No  | No      | Yes     | Yes     | Yes     | Yes | Yes     | Yes     | Yes     |
| Chen et al., 2011  | No  | No      | Yes     | Yes     | Yes     | Yes | Yes     | Yes     | Yes     |
| Wei et al., 2022   | Yes | Yes     | Yes     | Yes     | Yes     | No  | Unclear | Unclear | Yes     |
| Gou et al., 2022   | Yes | No      | Yes     | Yes     | Yes     | Yes | Unclear | Unclear | Yes     |

Sun et al., 2022    No    Yes    Yes    Yes    Unclear    Unclear    No    Yes    Yes

The JBI Checklist provides quality criteria for prevalence studies in nine distinct items. The table indicates which items have been fulfilled for each included study, respectively:

Q1: Was the sample frame appropriate to address the target population?

Q2: Were study participants recruited in an appropriate way?

Q3: Was the sample size adequate?

Q4: Were the study subjects and setting described in detail?

Q5: Was data analysis conducted with sufficient coverage of the identified sample?

Q6: Were valid methods used for the identification of the condition?

Q7: Was the condition measured in a standard, reliable way for all participants?

Q8: Was there appropriate statistical analysis?

Q9: Was the response rate adequate, and if not, was the low response rate managed appropriately?

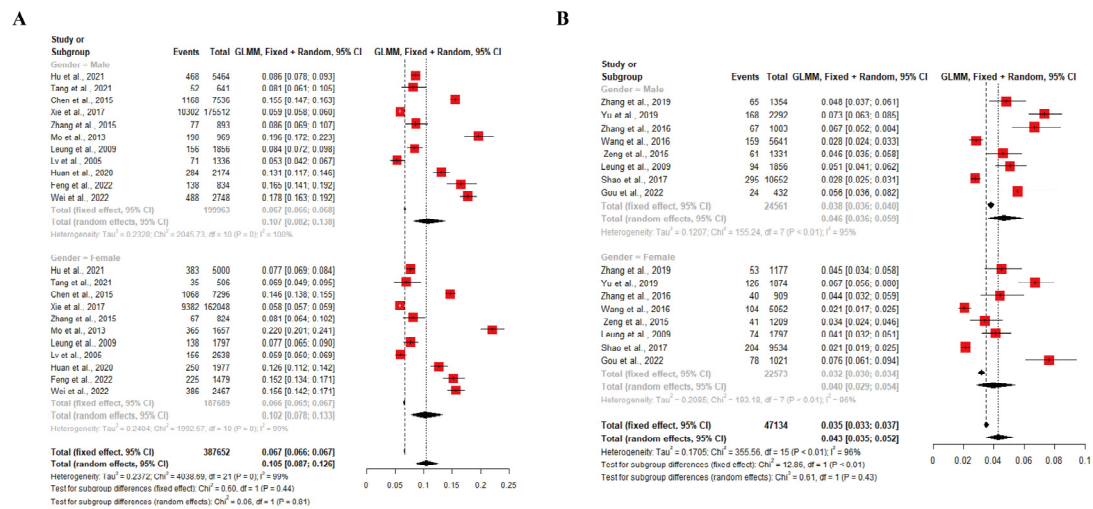

**Figure S1** Forest plot for subgroup analyses of pooled prevalence of self-reported FA (A) and self-reported physician-diagnosed FA (B) based on gender.

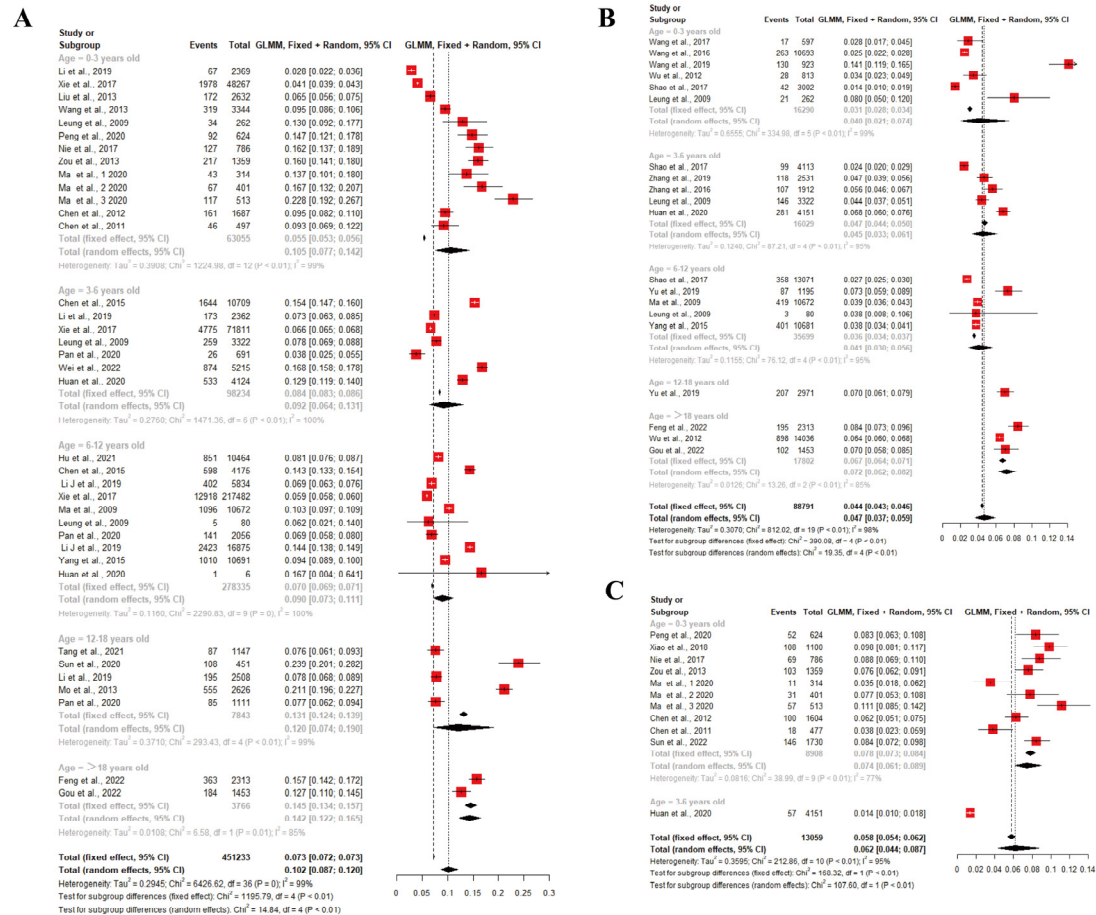

**Figure S2** Forest plot for subgroup analyses of pooled prevalence of self-reported FA (A), self-reported physician-diagnosed FA (B), and OFC-positive FA (C) based on age.

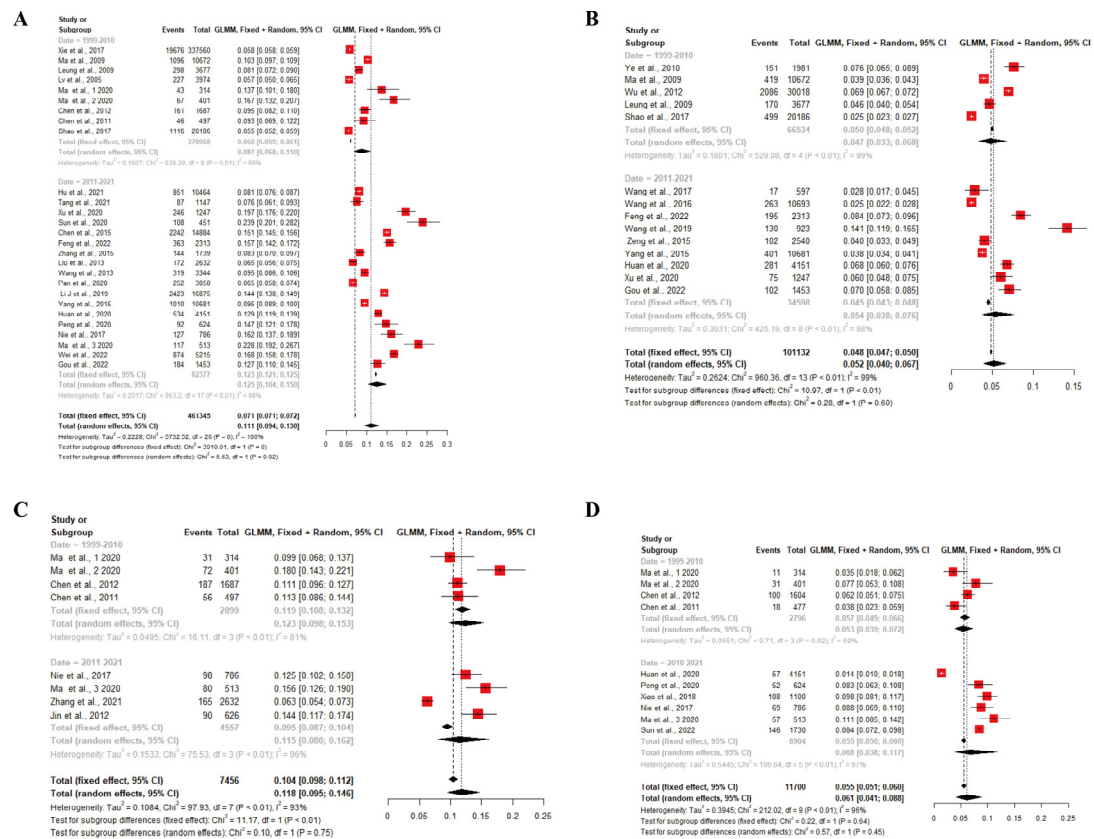

**Figure S3** Forest plot for subgroup analyses of pooled prevalence of self-reported FA (A), self-reported physician-diagnosed FA (B), SPT-positive FA (C) and OFC-positive FA (D) based on year of data collection.

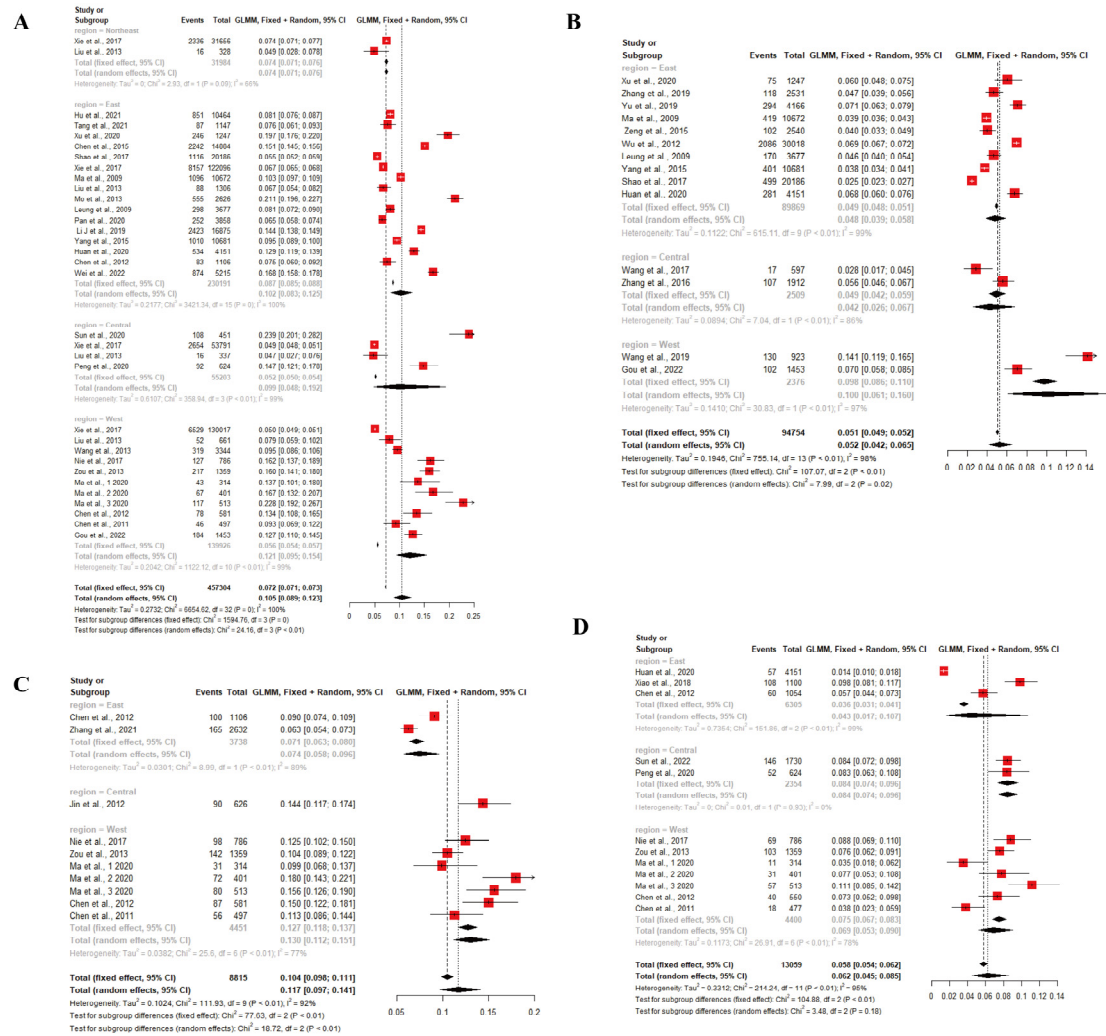

**Figure S4** Forest plot for subgroup analyses of pooled prevalence of self-reported FA (A), self-reported physician-diagnosed FA (B), SPT-positive FA (C) and OFC-positive FA (D) based on region.

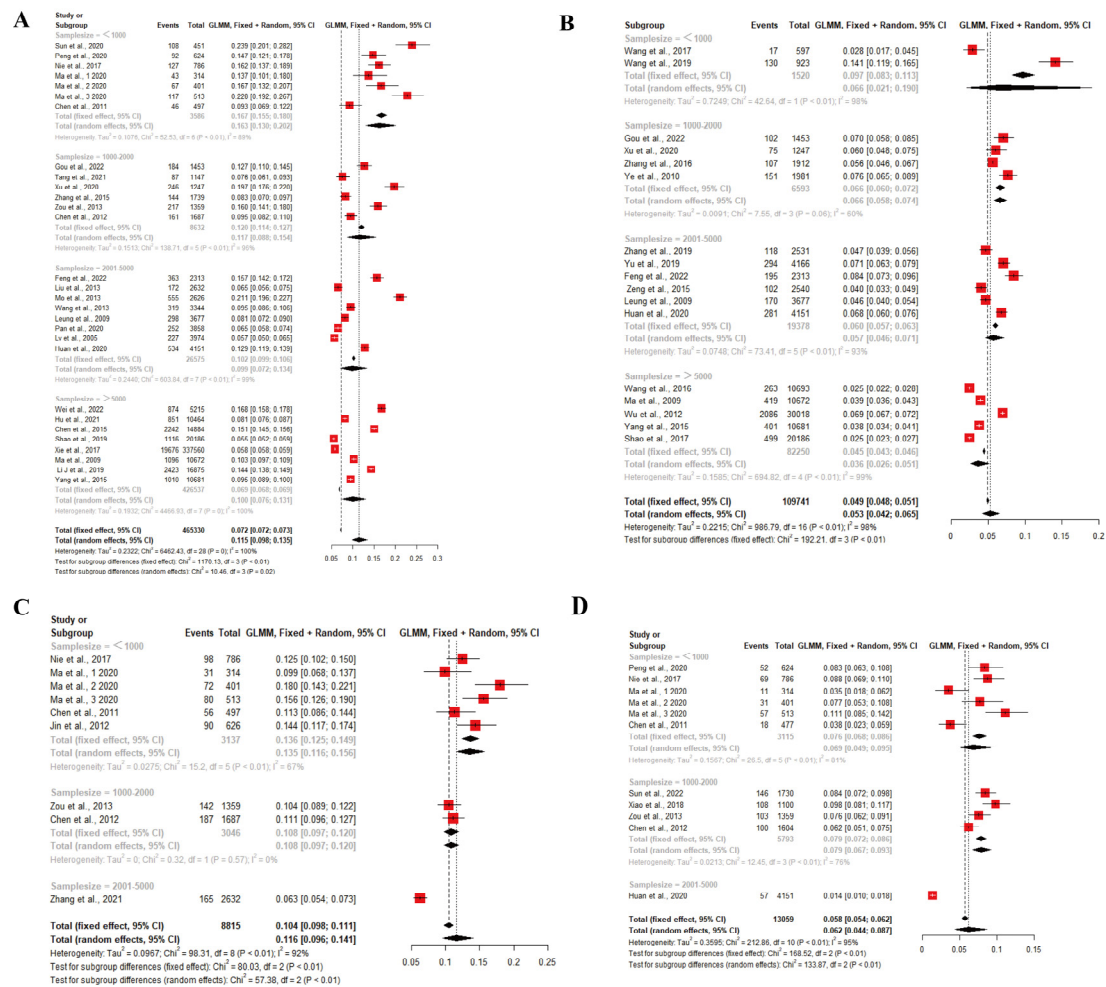

**Figure S5** Forest plot for subgroup analyses of pooled prevalence of self-reported FA (A), self-reported physician-diagnosed FA (B), SPT-positive FA (C) and OFC-positive FA (D) based on sample size.

**Table S2** meta-regression analyses for lifetime prevalence of self-reported FA in China

| Covariate               | Meta-regression estimate | 95% CI             | P value |
|-------------------------|--------------------------|--------------------|---------|
| Gender                  | -0.0501                  | -0.4627 to 0.3626  | 0.8119  |
| Age                     | 0.0436                   | -0.1001 to 0.1872  | 0.5523  |
| Year of data collection | 0.4033                   | 0.0515 to 0.7551   | 0.0246  |
| Regions                 | 0.1397                   | -0.0384 to 0.3178  | 0.1242  |
| Sample size             | -0.1830                  | -0.3266 to -0.0394 | 0.0125  |

**Table S3** meta-regression analyses for lifetime prevalence of self-reported physician-diagnosed FA in China

| Covariate               | Meta-regression estimate | 95% CI             | P value |
|-------------------------|--------------------------|--------------------|---------|
| Gender                  | -0.1688                  | -0.5834 to 0.2458  | 0.4249  |
| Age                     | 0.1470                   | -0.0238 to 0.3177  | 0.0916  |
| Year of data collection | 0.1450                   | -0.4190 to 0.7090  | 0.6143  |
| Regions                 | 0.3198                   | 0.0444 to 0.5951   | 0.0228  |
| Sample size             | -0.2518                  | -0.4488 to -0.0549 | 0.0122  |

**Table S4** meta-regression analyses for point prevalence of SPT-positive FA in China

| Covariate               | Meta-regression estimate | 95% CI             | P value |
|-------------------------|--------------------------|--------------------|---------|
| Gender                  | -                        | -                  | -       |
| Age                     | -                        | -                  | -       |
| Year of data collection | -0.0769                  | -0.5605 to 0.4066  | 0.7552  |
| Regions                 | 0.0737                   | 0.0089 to 0.1385   | 0.0258  |
| Sample size             | -0.3904                  | -0.5366 to -0.2443 | <.0001  |

**Table S5** meta-regression analyses for point prevalence of OFC-positive FA in China

| Covariate               | Meta-regression estimate | 95% CI             | P value |
|-------------------------|--------------------------|--------------------|---------|
| Gender                  | -                        | -                  | -       |
| Age                     | -1.7615                  | -2.3663 to -1.1567 | <.0001  |
| Year of data collection | 0.3143                   | -0.4947 to 1.1232  | 0.4464  |
| Regions                 | 0.2009                   | -0.1757 to 0.5774  | 0.2958  |
| Sample size             | -0.4497                  | -0.9318 to -0.0324 | 0.0425  |



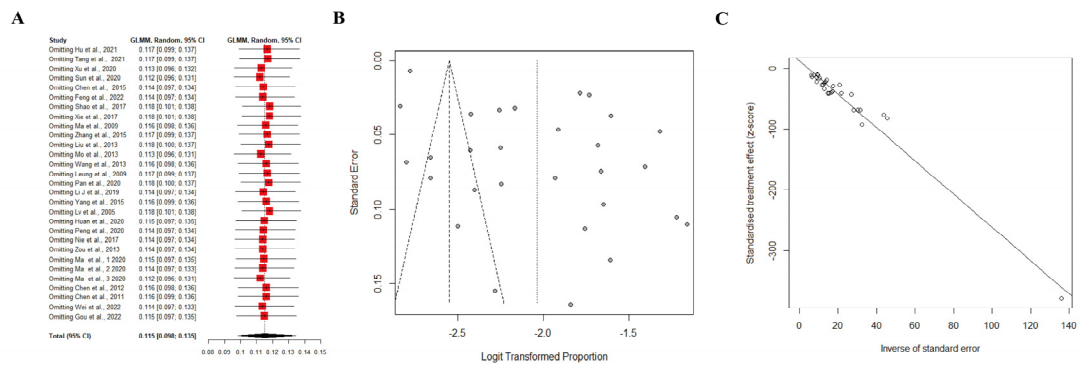

**Figure S6** Sensitivity Analysis (A), funnel plot (B) and Egger's tests (C) for the lifetime prevalence of self-reported FA.

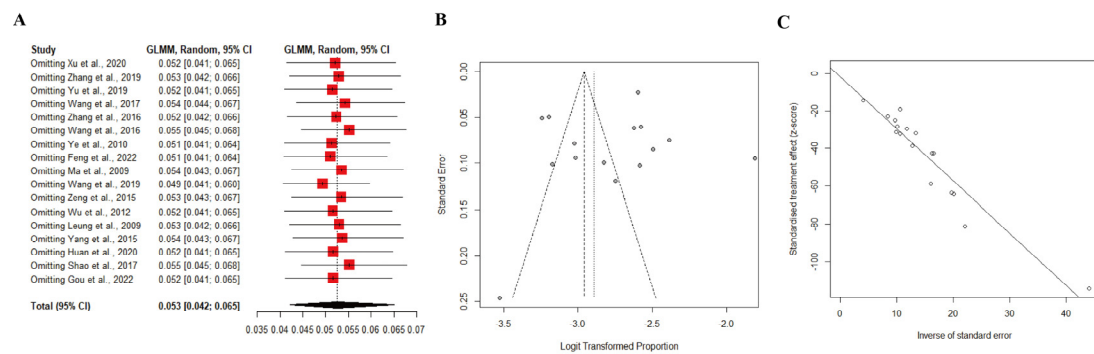

**Figure S7** Sensitivity Analysis (A), funnel plot (B) and Egger's tests (C) for the lifetime prevalence of self-reported physician-diagnosed FA.

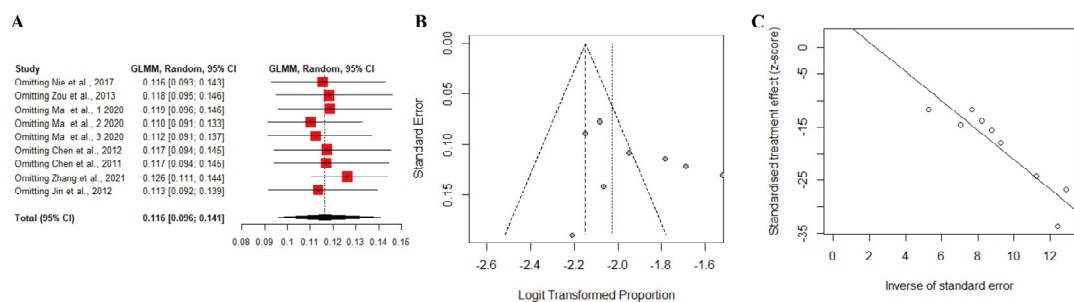

**Figure S8** Sensitivity Analysis (A), funnel plot (B) and Egger's tests (C) for the point prevalence of SPT-positive FA.



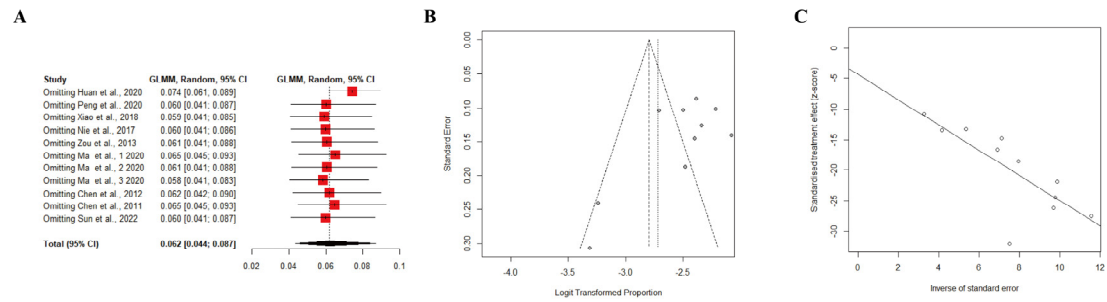

**Figure S9** Sensitivity Analysis (A), funnel plot (B) and Egger's tests (C) for the point prevalence of OFC-positive FA.
